# Supplementary material for: Exploring the Association of Innate Immunity Biomarkers With MRI Features in Both Early and Late Stages Osteoarthritis
Source: PubMed Central journal article supplement (PMC7689194; doi:10.3389/fmed.2020.554669), 2020-11-12
Supplement: Data_Sheet_1.pdf [file Data_Sheet_1.pdf]

Online supplementary material

Rajandran SN et al. Exploring the association of innate immunity biomarkers with MRI features in both early and late stages osteoarthritis

Supplementary Table I. Assay information of all measured biomarkers

| Biomarkers   | Biomarker Function                       | LLOD     | Manufacturer   | Serum                      |          |                                           |          | Synovial fluid             |          |                                           |          | Mean intra assay CV (%) | Mean inter assay CV (%) |
|--------------|------------------------------------------|----------|----------------|----------------------------|----------|-------------------------------------------|----------|----------------------------|----------|-------------------------------------------|----------|-------------------------|-------------------------|
|              |                                          |          |                | Number of samples measured |          | Samples with concentration above LLOD (%) |          | Number of samples measured |          | Samples with concentration above LLOD (%) |          |                         |                         |
|              |                                          |          |                | Early KOA                  | Late KOA | Early KOA                                 | Late KOA | Early KOA                  | Late KOA | Early KOA                                 | Late KOA |                         |                         |
| LBP          | Bind to LPS to elicit immune response    | 4.4ng/mL | Hycult Biotech | 145                        | 109      | 99.3                                      | 99.1     | 47                         | 69       | 97.9                                      | 98.6     | 3.8                     | 4.0                     |
| TLR4         | Transmembrane protein that detects PAMPs | 25pg/mL  | Arigo Biolab   | 145                        | 109      | 91                                        | 88.1     | 47                         | 69       | 70.8 <sup>δ</sup>                         | 100      | 3.5                     | 5.0                     |
| CD14         | Marker on activated macrophages          | 125pg/mL | R&D Systems    | 145                        | 109      | 100                                       | 100      | 47                         | 69       | 97.9                                      | 100      | 2.3                     | 3.3                     |
| IL6          | Pro-inflammatory cytokine                | 0.5pg/mL | Merck          | 145                        | 109      | 48.3 <sup>δ</sup>                         | 100      | 47                         | 69       | 97.9                                      | 100      | 5.7                     | 5.9                     |
| IL8          | Chemokine produced by macrophages        | 0.5pg/mL | Merck          | 145                        | 109      | 64.8 <sup>δ</sup>                         | 100      | 47                         | 69       | 97.9                                      | 100      | 5.7                     | 5.9                     |
| TNF $\alpha$ | Marker of systemic inflammation          | 0.5pg/mL | Merck          | 145                        | 109      | 81.3                                      | 100      | 47                         | 69       | 91.7                                      | 100      | 5.7                     | 5.9                     |

<sup>δ</sup> Biomarkers analysed as categorical variables (0 = concentration below LLOD, 1 = concentration above LLOD). IL = Interleukin; CD = Cluster of differentiation; TNF $\alpha$  = Tumour necrosis factor alpha; LBP = Lipopolysaccharide binding protein; LPS = Lipopolysaccharide; TLR4 = Toll-like receptor 4; PAMPs = Pathogen associated molecular patterns; CV = Coefficient of Variation; LLOD = Lower limit of detection; Early = Early KOA cohort; Late = Late KOA cohort.

Supplementary Table II. Spearman's Rho Correlations between various biomarkers

| <b>Earlier stage of KOA</b> |         |          |          |           |          |           |         |          |         |          |                  |                   |
|-----------------------------|---------|----------|----------|-----------|----------|-----------|---------|----------|---------|----------|------------------|-------------------|
|                             | (s) LBP | (sf) LBP | (s) TLR4 | (sf) TLR4 | (s) CD14 | (sf) CD14 | (s) IL6 | (sf) IL6 | (s) IL8 | (sf) IL8 | (s) TNF $\alpha$ | (sf) TNF $\alpha$ |
| (s) LBP                     | -       | 0.395**  | 0.029    | 0.183     | 0.166    | -0.142    | 0.200*  | 0.238    | 0.074   | 0.459**  | 0.278**          | 0.352*            |
| (sf) LBP                    | 0.395** | -        | -0.092   | -0.012    | 0.113    | 0.160     | 0.280   | 0.487**  | 0.280   | 0.324*   | 0.042            | 0.475**           |
| (s) TLR4                    | 0.029   | -0.092   | -        | 0.384**   | -0.014   | 0.079     | 0.010   | 0.022    | 0.029   | -0.144   | -0.004           | -0.029            |
| (sf) TLR4                   | 0.183   | -0.012   | 0.384**  | -         | -0.142   | -0.040    | 0.058   | 0.081    | 0.017   | 0.003    | -0.074           | 0.161             |
| (s) CD14                    | 0.166   | 0.113    | -0.014   | -0.142    | -        | 0.211     | 0.046   | 0.337*   | 0.083   | 0.261    | 0.030            | -0.037            |
| (sf) CD14                   | -0.142  | 0.160    | 0.079    | -0.040    | 0.211    | -         | 0.014   | 0.249    | -0.031  | 0.100    | -0.170           | -0.086            |
| (s) IL6                     | 0.200*  | 0.280    | 0.010    | 0.058     | 0.046    | 0.014     | -       | 0.199    | 0.461** | 0.426**  | 0.565**          | 0.371**           |
| (sf) IL6                    | 0.238   | 0.487**  | 0.022    | 0.081     | 0.337*   | 0.249     | 0.199   | -        | 0.144   | 0.510**  | 0.129            | 0.444**           |
| (s) IL8                     | 0.074   | 0.280    | 0.029    | 0.017     | 0.083    | -0.031    | 0.461** | 0.144    | -       | 0.155    | 0.531**          | 0.191             |
| (sf) IL8                    | 0.459** | 0.324*   | -0.144   | 0.003     | 0.261    | 0.100     | 0.426** | 0.510**  | 0.155   | -        | 0.205            | 0.644**           |
| (s) TNF $\alpha$            | 0.278** | 0.042    | -0.004   | -0.074    | 0.030    | -0.170    | 0.565** | 0.129    | 0.531** | 0.205    | -                | 0.278             |
| (sf) TNF $\alpha$           | 0.352*  | 0.475**  | -0.029   | 0.161     | -0.037   | -0.086    | 0.371** | 0.444**  | 0.191   | 0.644**  | 0.278            | -                 |
| <b>Later stage of KOA</b>   |         |          |          |           |          |           |         |          |         |          |                  |                   |
|                             | (s) LBP | (sf) LBP | (s) TLR4 | (sf) TLR4 | (s) CD14 | (sf) CD14 | (s) IL6 | (sf) IL6 | (s) IL8 | (sf) IL8 | (s) TNF $\alpha$ | (sf) TNF $\alpha$ |
| (s) LBP                     | -       | 0.741**  | 0.040    | -0.357    | -0.003   | 0.269     | 0.309   | 0.402    | 0.038   | 0.162    | 0.059            | 0.408             |
| (sf) LBP                    | 0.741** | -        | -0.210   | -0.238    | -0.189   | 0.378     | 0.274   | -0.119   | -0.504  | 0.217    | 0.105            | 0.410             |
| (s) TLR4                    | 0.040   | -0.210   | -        | 0.483     | -0.530*  | 0.123     | 0.082   | 0.147    | 0.196   | 0.002    | 0.010            | 0.262             |
| (sf) TLR4                   | -0.357  | -0.238   | 0.483    | -         | -0.154   | -0.448    | -0.288  | -0.455   | 0.417   | -0.476   | 0.343            | -0.378            |
| (s) CD14                    | -0.003  | -0.189   | -0.530*  | -0.154    | -        | -0.140    | -0.282  | 0.115    | 0.175   | 0.012    | 0.079            | -0.234            |
| (sf) CD14                   | 0.269   | 0.378    | 0.123    | -0.448    | -0.140   | -         | 0.106   | 0.487*   | -0.360  | 0.574**  | -0.127           | 0.762**           |
| (s) IL6                     | 0.309   | 0.274    | 0.082    | -0.288    | -0.282   | 0.106     | -       | 0.365    | -0.274  | -0.066   | 0.118            | 0.374             |
| (sf) IL6                    | 0.402   | -0.119   | 0.147    | -0.455    | 0.115    | 0.487*    | 0.365   | -        | -0.113  | 0.361    | -0.162           | 0.612**           |
| (s) IL8                     | 0.038   | -0.504   | 0.196    | 0.417     | 0.175    | -0.360    | -0.274  | -0.113   | -       | -0.266   | 0.228            | -0.334            |
| (sf) IL8                    | 0.162   | 0.217    | 0.002    | -0.476    | 0.012    | 0.574**   | -0.066  | 0.361    | -0.266  | -        | -0.059           | 0.542*            |
| (s) TNF $\alpha$            | 0.059   | 0.105    | 0.010    | 0.343     | 0.079    | -0.127    | 0.118   | -0.162   | 0.228   | -0.059   | -                | 0.041             |
| (sf) TNF $\alpha$           | 0.408   | 0.410    | 0.262    | -0.378    | -0.234   | 0.762**   | 0.374   | 0.612**  | -0.334  | 0.542*   | 0.041            | -                 |

\*p<0.05, \*\*p<0.01; (sf) = synovial fluid; (s) = serum; LBP = Lipopolysaccharide Binding Protein; TLR = Toll-like receptor; IL= interleukin; CD = cluster of differentiation; TNF $\alpha$  = Tumour Necrosis Factor alpha;

Supplementary Table III. Univariate associations between biomarkers and MRI features and other outcomes in earlier stage of KOA

| Dependent variables   | $\beta$ (95% confidence intervals)    |                          |                                      |                        |                          |                                      |                                        |                                       |                                       |                                       |                                       |                          |
|-----------------------|---------------------------------------|--------------------------|--------------------------------------|------------------------|--------------------------|--------------------------------------|----------------------------------------|---------------------------------------|---------------------------------------|---------------------------------------|---------------------------------------|--------------------------|
|                       | (s) LBP                               | (sf) LBP                 | (s) TLR4                             | (sf) TLR4 <sup>§</sup> | (s) CD14                 | (sf) CD14                            | (s) IL6 <sup>§</sup>                   | (sf) IL6                              | (s) IL8 <sup>§</sup>                  | (sf) IL8                              | (s) TNF $\alpha$                      | (sf) TNF $\alpha$        |
| OST Size              | 1.21<br>(-0.67, 2.98)                 | 0.29<br>(-1.48, 2.06)    | 0.28<br>(-0.24, 0.79)                | -0.05<br>(-0.63, 0.53) | 0.82<br>(-3.29, 4.92)    | -0.60<br>(-1.58, 0.38)               | <b>1.41</b><br><b>(0.77, 18.93)**†</b> | -0.00<br>(-0.64, 0.64)                | <b>0.71</b><br><b>(0.09, 1.34)*†</b>  | 1.49<br>(-0.05, 3.02)                 | <b>1.23</b><br><b>(0.61, 1.86)**†</b> | -1.38<br>(-3.56, 0.80)   |
| % Cart Loss           | 1.34<br>(-0.43, 3.11)                 | 0.68<br>(-1.11, 2.47)    | 0.34<br>(-0.16, 0.84)                | -0.41<br>(-1.01, 0.20) | 3.24<br>(-1.01, 7.49)    | -1.35<br>(-2.60, -0.10)*             | <b>1.03</b><br><b>(0.41, 1.64)**†</b>  | -0.16<br>(-0.74, 0.42)                | 0.55<br>(-0.07, 1.17)                 | 0.67<br>(-0.86, 2.20)                 | <b>1.14</b><br><b>(0.52, 1.76)**†</b> | -2.02<br>(-4.40, 0.36)   |
| % Cart Full Thickness | 1.17<br>(-0.62, 2.96)                 | -0.23<br>(-2.18, 1.73)   | <b>0.65</b><br><b>(0.12, 1.18)*†</b> | 1.73<br>(-0.42, 0.76)  | 2.38<br>(-1.80, 6.56)    | -0.46<br>(-1.24, 0.31)               | <b>1.04</b><br><b>(0.42, 1.65)**†</b>  | 0.27<br>(-0.31, 0.86)                 | <b>0.85</b><br><b>(0.22, 1.48)**†</b> | 1.16<br>(-0.57, 2.89)                 | <b>1.23</b><br><b>(0.59, 1.86)**†</b> | -1.17<br>(=3.66, 1.32)   |
| BML Size              | 1.21<br>(-0.62, 3.05)                 | -0.01<br>(-1.68, 1.65)   | 0.51<br>(0.02, 1.01)*                | 0.07<br>(-0.49, 0.64)  | 1.69<br>(-2.36, 5.73)    | -0.05<br>(-0.78, 0.68)               | <b>0.99</b><br><b>(0.38, 1.61)**†</b>  | -0.05<br>(-0.69, 0.59)                | <b>0.74</b><br><b>(0.11, 1.36)*†</b>  | 1.29<br>(-0.70, 3.28)                 | <b>0.98</b><br><b>(0.34, 1.61)**†</b> | 0.98<br>(-1.08, 3.05)    |
| % BML Size            | 1.12<br>(-0.72, 2.96)                 | -0.01<br>(-1.68, 1.66)   | 0.47<br>(-0.03, 0.97)                | 0.12<br>(-0.45, 0.68)  | 1.94<br>(-2.13, 6.00)    | -0.05<br>(-0.77, 0.68)               | <b>0.91</b><br><b>(0.30, 1.52)**†</b>  | -0.04<br>(-0.69, 0.61)                | <b>0.75</b><br><b>(0.12, 1.38)*†</b>  | 1.31<br>(-0.71, 3.32)                 | <b>0.95</b><br><b>(0.32, 1.59)**†</b> | 1.04<br>(-1.03, 3.11)    |
| Synovitis             | 1.70<br>(-0.33, 3.73)                 | 0.68<br>(-1.05, 2.41)    | 0.54<br>(-0.11, 1.19)                | -0.10<br>(-0.66, 0.46) | 3.17<br>(-1.41, 7.74)    | 0.59<br>(-0.27, 1.44)                | <b>0.98</b><br><b>(0.32, 1.63)**†</b>  | 0.55<br>(-0.15, 1.25)                 | <b>0.75</b><br><b>(0.07, 1.43)*†</b>  | 0.83<br>(-0.94, 2.59)                 | <b>1.27</b><br><b>(0.52, 2.02)**†</b> | -0.85<br>(-3.27, 1.57)   |
| Effusion              | 1.74<br>(-0.18, 3.66)                 | 1.98<br>(-0.54, 4.51)    | -0.01<br>(-0.53, 0.52)               | -0.03<br>(0.64, 0.57)  | 2.47<br>(-1.88, 6.83)    | <b>1.06</b><br><b>(0.02, 2.10)*†</b> | <b>0.79</b><br><b>(0.15, 1.43)*†</b>   | <b>1.17</b><br><b>(0.40, 1.94)**†</b> | <b>0.82</b><br><b>(0.17, 1.47)*†</b>  | 1.16<br>(-0.65, 2.98)                 | <b>1.21</b><br><b>(0.53, 1.88)**†</b> | 1.05<br>(-1.66, 3.75)    |
| Meniscus Extrusion    | <b>4.47</b><br><b>(2.06, 6.89)**†</b> | 0.31<br>(-1.68, 2.30)    | -0.00<br>(-0.58, 0.58)               | 0.08<br>(-0.51, 0.67)  | 2.50<br>(-2.24, 7.23)    | 0.04<br>(-0.72, 0.80)                | <b>1.27</b><br><b>(0.56, 1.98)**†</b>  | <b>0.84</b><br><b>(0.12, 1.56)*</b>   | 0.39<br>(-0.34, 1.12)                 | <b>3.93</b><br><b>(1.27, 6.58)**†</b> | <b>1.07</b><br><b>(0.25, 1.90)*†</b>  | 0.40<br>(-1.99, 2.79)    |
| KL grade              | 1.13<br>(-0.70, 2.96)                 | -0.32<br>(-2.22, 1.58)   | 0.56<br>(-0.01, 1.12)                | 0.13<br>(-0.43, 0.69)  | 2.93<br>(-1.27, 7.13)    | 0.04<br>(-0.71, 0.80)                | <b>0.93</b><br><b>(0.30, 1.56)**†</b>  | 0.17<br>(-0.49, 0.82)                 | 0.38<br>(-0.24, 1.01)                 | 0.33<br>(-1.43, 2.10)                 | <b>0.85</b><br><b>(0.23, 1.46)**†</b> | -1.43<br>(-3.84, 0.98)   |
| WOMAC pain            | 4.86<br>(-14.07, 23.78)               | -9.32<br>(-29.66, 11.02) | 1.54<br>(-3.72, 6.80)                | 2.81<br>(-3.06, 8.69)  | 24.57<br>(-17.93, 67.06) | -1.38<br>(-10.61, 7.84)              | 0.62<br>(-5.59, 6.83)                  | -3.16<br>(-9.25, 2.92)                | 2.81<br>(-3.49, 9.10)                 | -5.72<br>(-20.75, 9.30)               | 5.08<br>(-1.04, 11.20)                | -12.05<br>(-33.68, 9.58) |
| WOMAC function        | -4.02<br>(-24.46, 16.43)              | -7.55<br>(-27.84, 12.74) | 0.03<br>(-5.65, 5.72)                | 2.57<br>(-3.25, 8.39)  | 19.53<br>(-26.39, 65.44) | -2.00<br>(-11.10, 7.11)              | -2.07<br>(-8.79, 4.65)                 | -1.70<br>(-7.76, 4.35)                | 2.22<br>(-4.59, 9.03)                 | 0.64<br>(-14.30, 15.58)               | 0.37<br>(-6.30, 7.04)                 | 0.30<br>(-21.32, 21.92)  |

\* $p < 0.05$ , \*\* $p < 0.01$ , † Bonferroni-adjusted  $p < 0.025$  for cartilage loss and BMLs,  $p < 0.05$  for all other domains (Bold).

§ (s) IL6 and IL8 analysed as categorical variable in the early KOA cohort as more than 70% less than Lower limit of detection (0 = Below Lower Limit of Detection and 1 = Above Lower Limit of Detection).

MRI = Magnetic Resonance Imaging; % = percentage; BML = Bone Marrow Lesion; Cart = Cartilage; OST = Osteophyte; KL = Kellgren and Lawrence grading; (sf) = synovial fluid; (s) = serum; IL= interleukin; CD = cluster of differentiation; TNF $\alpha$  = Tumour Necrosis Factor alpha; LBP = Lipopolysaccharide Binding Protein; TLR = Toll-like receptor; vs.=versus.

Supplementary Table IV. Univariate associations between biomarkers and MRI features and other outcomes in later stage of KOA

| Dependent variables   | $\beta$ (95% confidence intervals)       |                         |                          |                           |                                           |                          |                                        |                                      |                         |                           |                           |                          |
|-----------------------|------------------------------------------|-------------------------|--------------------------|---------------------------|-------------------------------------------|--------------------------|----------------------------------------|--------------------------------------|-------------------------|---------------------------|---------------------------|--------------------------|
|                       | (s)<br>LBP                               | (sf)<br>LBP             | (s)<br>TLR4              | (sf)<br>TLR4              | (s)<br>CD14                               | (sf)<br>CD14             | (s)<br>IL6                             | (sf)<br>IL6                          | (s)<br>IL8              | (sf)<br>IL8               | (s)<br>TNF $\alpha$       | (sf)<br>TNF $\alpha$     |
| OST Size              | 6.09<br>(-3.68, 15.86)                   | 7.87<br>(-2.87, 18.61)  | 0.04<br>(-1.36, 1.43)    | 7.59<br>(-7.23, 22.41)    | -3.69<br>(-17.41, 10.04)                  | 0.90<br>(-0.71, 2.50)    | 0.51<br>(-1.27, 2.29)                  | -0.13<br>(-2.44, 2.19)               | -1.16<br>(-3.66, 1.34)  | 5.96<br>(-5.09, 17.00)    | -2.83<br>(-6.77, 1.11)    | -1.12<br>(-11.18, 8.94)  |
| Cart Loss %           | 5.58<br>(-3.88, 15.03)                   | 15.29<br>(0.82, 29.77)* | -0.78<br>(-2.55, 1.00)   | 1.81<br>(-14.03, 17.64)   | -8.98<br>(-25.00, 7.05)                   | 1.56<br>(-0.37, 3.49)    | 0.82<br>(-1.53, 3.17)                  | -0.52<br>(-2.69, 1.64)               | -2.11<br>(-5.25, 1.03)  | 4.12<br>(-7.04, 15.28)    | -0.23<br>(-4.26, 3.80)    | 6.84<br>(-5.41, 19.09)   |
| % Cart Full Thickness | 5.66<br>(-3.91, 15.22)                   | 12.11<br>(0.21, 24.02)* | -1.18<br>(-2.30, 0.64)   | 2.34<br>(-11.93, 16.60)   | -11.52<br>(-27.09, 4.05)                  | 1.98<br>(-0.07, 4.02)    | 0.66<br>(-1.63, 2.95)                  | -0.57<br>(-2.65, 1.50)               | -1.15<br>(-4.06, 1.77)  | 4.55<br>(-5.44, 14.54)    | -1.29<br>(-5.28, 2.70)    | 3.79<br>(-6.62, 14.20)   |
| BML Size              | -2.35<br>(-10.98, 6.27)                  | -1.03<br>(-9.09, 7.02)  | -0.49<br>(-1.61, 0.67)   | -0.99<br>(-17.11, 11.12)  | -1.01<br>(-16.48, 14.46)                  | 1.59<br>(-0.39, 3.59)    | 0.33<br>(-1.63, 2.30)                  | 0.60<br>(-1.33, 2.52)                | -1.35<br>(-4.06, 1.35)  | 4.54<br>(-5.27, 14.35)    | 0.05<br>(-3.40, 3.51)     | -1.04<br>(-10.51, 8.45)  |
| % BML Size            | -2.33<br>(-11.06, 6.41)                  | -0.52<br>(-8.38, 7.34)  | -0.50<br>(-1.66, 0.65)   | -3.84<br>(-17.81, 10.14)  | -1.85<br>(-17.27, 13.56)                  | 2.16<br>(-0.04, 4.36)    | 0.08<br>(-1.81, 1.98)                  | 0.60<br>(-1.33, 2.52)                | -1.38<br>(-4.07, 1.31)  | 5.12<br>(-4.74, 14.97)    | -0.18<br>(-3.64, 3.28)    | -0.61<br>(-10.02, 8.81)  |
| Synovitis             | 5.53<br>(-3.74, 14.79)                   | 4.66<br>(-4.62, 13.94)  | -0.05<br>(-1.37, 1.27)   | 6.64<br>(-10.65, 23.92)   | 3.97<br>(-12.08, 20.04)                   | 1.17<br>(-0.78, 3.13)    | -0.14<br>(-2.16, 1.87)                 | -0.16<br>(-2.29, 1.97)               | -1.26<br>(-4.18, 1.65)  | 7.37<br>(-3.89, 18.63)    | 0.54<br>(-3.17, 4.25)     | 6.28<br>(-5.09, 17.64)   |
| Effusion              | 3.24<br>(-5.08, 11.56)                   | 8.73<br>(-1.01, 18.47)  | 0.50<br>(-0.77, 1.77)    | 6.08<br>(-7.78, 19.93)    | <b>-16.69</b><br><b>(-32.17, -1.21)*†</b> | 4.19<br>(-2.33, 10.72)   | 0.70<br>(-1.12, 2.52)                  | -0.88<br>(-2.87, 1.11)               | -1.52<br>(-4.15, 1.11)  | 0.51<br>(-9.93, 10.95)    | 0.60<br>(-3.15, 4.36)     | 1.17<br>(-8.26, 10.60)   |
| Meniscus Extrusion    | 1.89<br>(-8.36, 12.13)                   | 4.94<br>(-4.05, 13.94)  | -0.47<br>(-0.69, 0.74)   | -4.28<br>(-17.47, 8.91)   | -4.98<br>(-18.72, 8.77)                   | 1.24<br>(-0.64, 3.12)    | -0.86<br>(-2.82, 1.09)                 | 0.15<br>(-1.77, 2.08)                | -1.64<br>(-4.36, 1.08)  | 0.48<br>(-9.14, 10.10)    | -2.37<br>(-6.13, 1.38)    | -2.53<br>(-11.66, 6.60)  |
| KL grade              | 2.87<br>(-4.91, 10.65)                   | -5.19<br>(-14.11, 3.74) | 0.18<br>(-1.07, 1.43)    | -3.35<br>(-16.92, 10.23)  | -8.29<br>(-23.39, 6.83)                   | 1.48<br>(-0.61, 3.57)    | 0.36<br>(-1.55, 2.28)                  | <b>3.15</b><br><b>(0.37, 5.94)*†</b> | -1.05<br>(-3.79, 1.68)  | 3.77<br>(-6.19, 13.73)    | -1.00<br>(-4.59, 2.58)    | -2.25<br>(-11.57, 7.07)  |
| WOMAC pain            | <b>106.45</b><br><b>(20.57, 192.3)*†</b> | 85.13<br>(-1.56, 171.8) | -8.84<br>(-23.80, 6.12)  | -29.14<br>(-190.1, 131.9) | -29.68<br>(-190.4, 131.1)                 | 2.19<br>(-19.13, 23.52)  | <b>22.72</b><br><b>(2.72, 42.72)*</b>  | 8.20<br>(-14.06, 30.46)              | 2.21<br>(-28.87, 33.29) | -28.21<br>(-94.58, 38.16) | -22.74<br>(-64.21, 18.74) | 55.73<br>(-38.37, 149.8) |
| WOMAC function        | <b>89.70</b><br><b>(1.10, 178.3)*†</b>   | 84.21<br>(-4.50, 172.9) | -4.57<br>(-19.76, 10.62) | 15.25<br>(-148.8, 179.3)  | -1.97<br>(-161.9, 158.0)                  | -7.92<br>(-28.66, 12.82) | <b>24.78</b><br><b>(5.46, 44.10)*†</b> | 0.21<br>(-22.65, 22.23)              | 2.88<br>(-27.93, 33.69) | -49.87<br>(-111.9, 12.18) | -23.57<br>(-64.60, 17.45) | 23.58<br>(-73.19, 120.3) |

\* $p < 0.05$ , \*\* $p < 0.01$ , † Bonferroni-adjusted  $p < 0.025$  for cartilage loss and BMLs,  $p < 0.05$  for all other domains (Bold).

MRI = Magnetic Resonance Imaging; % = percentage; BML = Bone Marrow Lesion; Cart = Cartilage; OST = Osteophyte; KL = Kellgren and Lawrence grading; (sf) = synovial fluid; (s) = serum; IL= interleukin; CD = cluster of differentiation; TNF $\alpha$  = Tumour Necrosis Factor alpha; LBP = Lipopolysaccharide Binding Protein; TLR = Toll-like receptor; vs.=versus.
